# Supplementary material for: A Schiff base ligand for photoinduced atom transfer radical polymerization
Source: Royal Society of Chemistry journal article supplement (doi:10.1039/d0py01672a), 2021-01-01
Supplement: d0py01672a1.pdf [file d0py01672a1.pdf]

# Schiff Base Ligand for Photoinduced Atom Transfer Radical Polymerization

Xiaoling Xu,<sup>†‡</sup> Mei Hong,<sup>†‡</sup> Chunyang Bao,<sup>†‡</sup> Yan Wang,<sup>†‡</sup> Jing Chen,<sup>†‡</sup> Die Li,<sup>†‡</sup> Tianheng  
Wang,<sup>†‡</sup> Qiang Zhang<sup>†‡\*</sup>

<sup>†</sup> Key Laboratory of New Membrane Materials, Ministry of Industry and Information Technology, School of Environmental and Biological Engineering, Nanjing University of Science and Technology, Nanjing 210094, P. R. China.

<sup>‡</sup> Institute of Polymer Ecomaterials, School of Environmental and Biological Engineering, Nanjing University of Science and Technology, Nanjing 210094, P. R. China. Email: zhangqiang@njust.edu.cn

## Experimental Section

### Materials

Tris[*N*-(2-pyridylmethyl)-2-iminoethyl]amine (Py<sub>3</sub>Tren) and *N*-ethyl-2-pyridylmethanimine (PyEthyl) were synthesized according to literature procedures and stored at 2-8 °C.<sup>1, 2</sup> Copper(II) trifluoromethanesulfonate (Cu<sup>II</sup>(OTf)<sub>2</sub>, 98%, Energy Chemical), dimethyl sulfoxide (DMSO, 99%, Aladdin), ethyl  $\alpha$ -bromoisobutyrate (EBiB, 98%, TCI), methyl methacrylate (MMA, >99.5%, Aladdin) were used as received. All other reagents and solvents were obtained from Aladdin (China) and used without further purification unless otherwise stated.

### Instruments and analysis

<sup>1</sup>H NMR spectra were recorded at 25 °C with a Bruker AV 500 M spectrometer using deuterated solvents obtained from Aladdin. The number-average molecular weight ( $M_n$ ) and the molecular weight distribution ( $M_w/M_n$ ) were determined by Waters 1515 size exclusion chromatography (SEC) in *N,N*-dimethylbenzamide (DMF) at 40 °C with a flow rate of 1.00 mL min<sup>-1</sup>. The SEC was equipped with refractive index (RI) and UV detectors, a 20  $\mu$ m guard column (4.6 mm  $\times$  30 mm, 100–10 K) followed by three Waters Styragel columns (HR1, HR3 & HR4) and an autosampler. Narrow linear polystyrene standards in the range of 540 to  $7.4 \times 10^5$  g mol<sup>-1</sup> were used to calibrate the system. All samples were passed through a 0.45  $\mu$ m PTFE filter before analysis. A 120W super strong ultraviolet low pressure mercury lamp (CEL-LPH120-254, Beijing China Education Au-light co., Ltd.) and a 300 W Xe lamp (CEL-HXF 300, Beijing China Education Au-light co., Ltd.) with a 400 nm cutoff filter was

used as light source. The optical transmittance of the aqueous solution of thermoresponsive polymers at a wavelength of 500 nm was acquired on a SHIMADZU UV-2600 UV/Vis spectrophotometer. Electrospray ionization mass spectrometry (ESI-MS) measurements were performed in positive mode through using a Bruker Esquire 3000 Plus instrument.

### **General procedures for the photoinduced polymerization of MMA**

MMA (2.3 mL, 22 mmol, 50 eq), EBiB (65  $\mu$ L, 0.44 mmol, 1 eq), CuBr<sub>2</sub> (7.1 mg, 31.7  $\mu$ mol, 0.072 eq), Py<sub>3</sub>Tren (65.5 mg, 158.4  $\mu$ mol, 0.36 eq) and DMSO (2.3 mL) were added to a vial with a rubber seal and magnetic stir bar and degassed by purging with nitrogen for 30 mins. The reaction mixture was placed in a photoreactor, irradiating at different radiation sources (UV lamp or visible light), and monitored by taking samples periodically, analysing the polymer by both SEC and <sup>1</sup>H NMR spectroscopy.

### **General procedures for *in-situ* chain extension reactions**

MMA (2.3 mL, 22 mmol, 50 eq), EBiB (65  $\mu$ L, 0.44 mmol, 1 eq), CuBr<sub>2</sub> (7.1 mg, 31.7  $\mu$ mol, 0.072 eq), Py<sub>3</sub>Tren (65.5 mg, 158.4  $\mu$ mol, 0.36 eq) and DMSO (2.3 mL) were added to a vial with a rubber seal and magnetic stir bar and degassed by purging with nitrogen for 30 mins. The reaction mixture was placed in a photoreactor, irradiating at visible light. After 10 h a 1:1 mixture of degassed MMA (50 eq) and DMSO was added to the reaction mixture via degassed syringe. Samples were taken periodically and conversions were measured using <sup>1</sup>H NMR and SEC analysis.

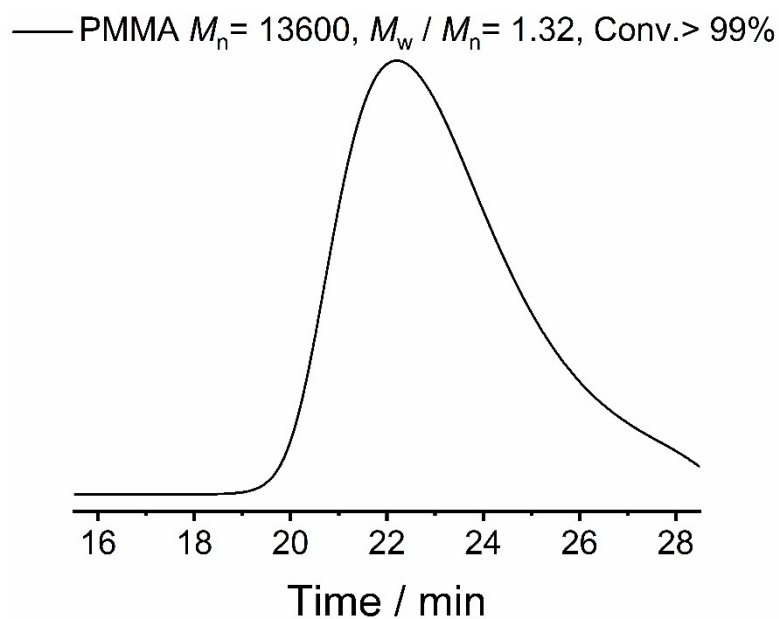

**Figure S1.** SEC elution curve of poly(MMA).

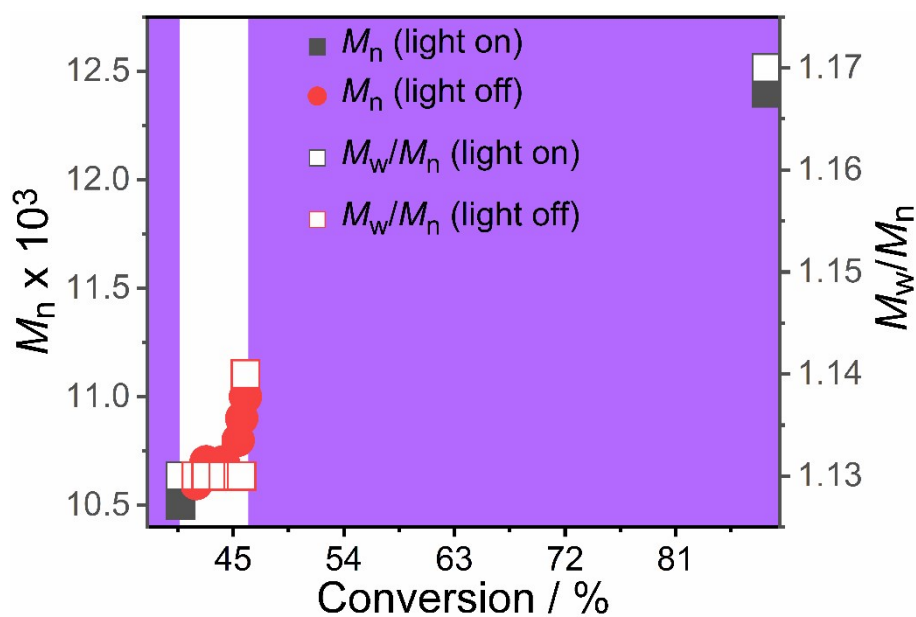

**Figure S2.** Temporal control of the Photo-ATRP of MMA under visible light irradiation. Molecular weight and dispersity as a function of monomer conversion. Reaction conditions:  $[MMA]_0 : [EBiB]_0 : [CuBr_2]_0 : [Py_3Tren]_0 = 50 : 1 : 0.072 : 0.36$  in 50 vol% DMSO with visible light irradiation.

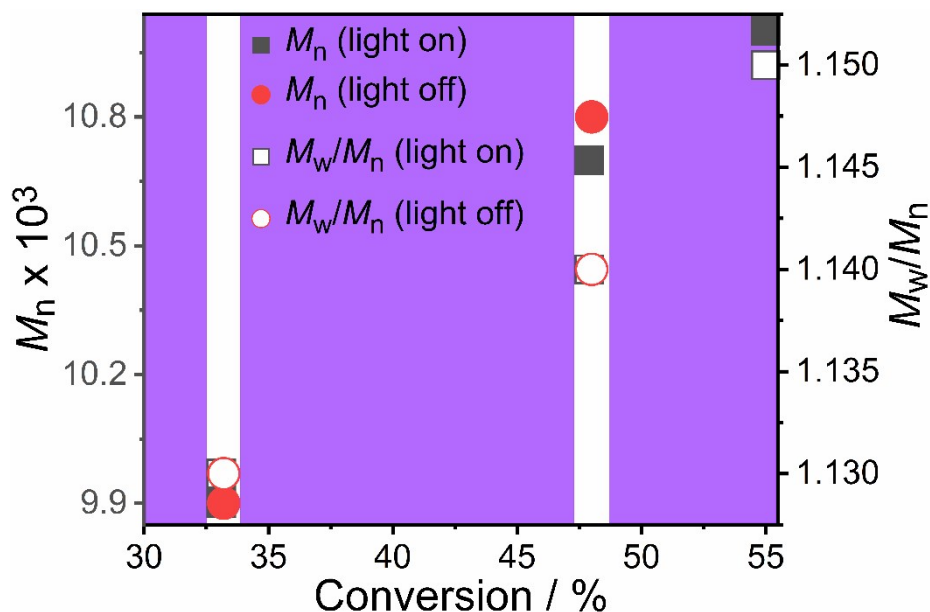

**Figure S3.** Temporal control of the Photo-ATRP of MMA under visible light irradiation. Molecular weight and dispersity as a function of monomer conversion. Reaction conditions:  $[MMA]_0:[EBiB]_0:[CuBr_2]_0:[Py_3Tren]_0 = 50:1:0.072:0.288$  in 50 vol% DMSO with visible light radiation.

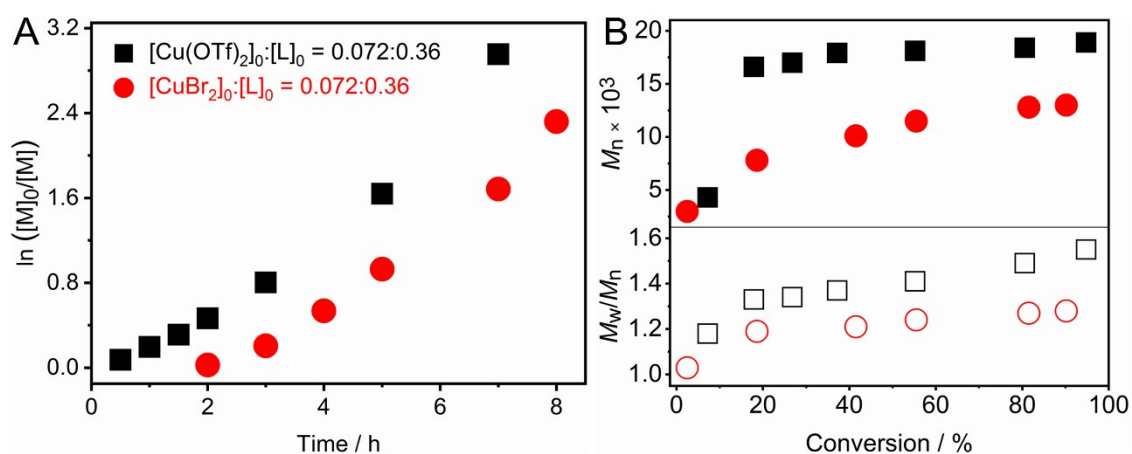

**Figure S4.** (A) Kinetics of polymerization (B) evolution of the  $M_n$  and  $M_w/M_n$  with conversion. Conditions:  $[MMA]_0:[EBiB]_0:[Cu^{II}]_0:[Py_3Tren]_0 = 50:1:0.072:0.36$ , in DMSO, irradiated by visible light. Two different  $Cu^{II}$  salts were used,  $CuBr_2$  and  $Cu^{II}(OTf)_2$ .

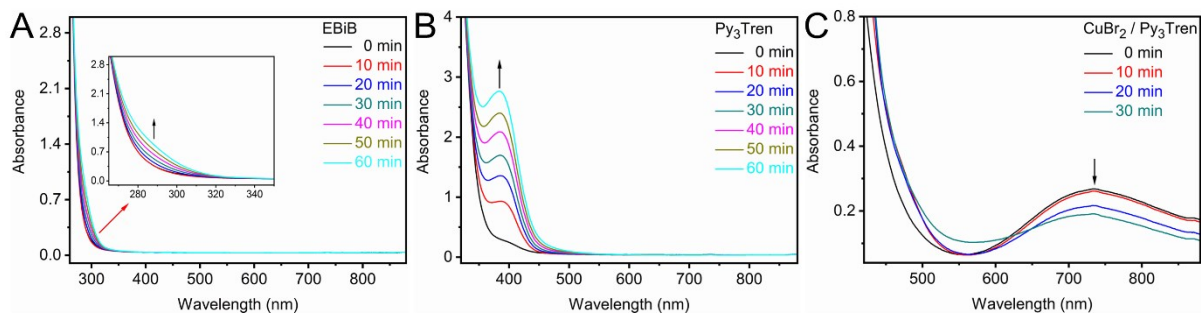

**Figure S5.** Evolution of UV-Vis spectra as a function of time. Conditions: (A) [EBiB] = 22 mM, (B) [L] = 4.4 mM, (C) [CuBr<sub>2</sub>] = 2.2 mM, [L] = 2.2 mM, where L = Py<sub>3</sub>Tren in DMSO. In all cases the samples were irradiated with 254 nm radiation, at 25 °C.

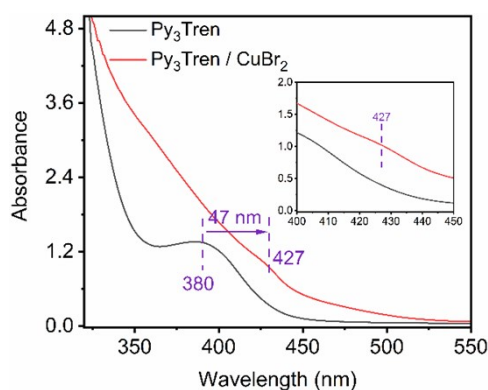

**Figure S6.** Evolution of UV-Vis spectra as a function of time. Conditions: [L] = 4.4 mM, [CuBr<sub>2</sub> / L] = 2.2 mM, where L = Py<sub>3</sub>Tren in DMSO at 25 °C.

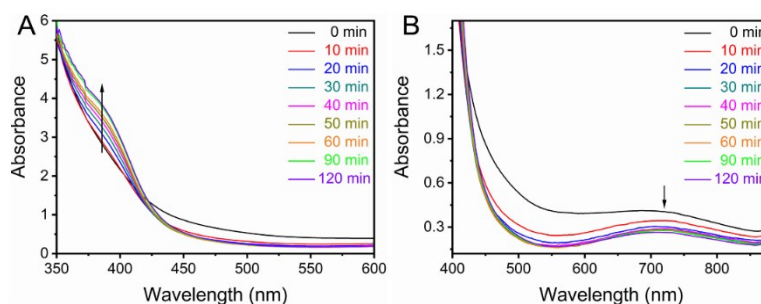

**Figure S7.** A partial enlarged view of the evolution of UV/Vis spectra as a function of time. Conditions: [CuBr<sub>2</sub>] = 2.2 mM, [L] = 11 mM, where L = Py<sub>3</sub>Tren in MMA/DMSO = 1/1 (v/v). In all cases the samples were irradiated with 254 nm radiation, at 25 °C.

**Table S1.** Photo-ATRP of MMA to range of DP<sub>n</sub>.

| Entry | [M] <sub>0</sub> : [I] <sub>0</sub> : [CuBr <sub>2</sub> ] <sub>0</sub> : [L] <sub>0</sub> <sup>a</sup> | Time / h | M <sub>n, th</sub> | M <sub>n, SEC</sub> <sup>b</sup> | M <sub>w</sub> / M <sub>n</sub> <sup>b</sup> | Conv. <sup>c</sup> |
|-------|---------------------------------------------------------------------------------------------------------|----------|--------------------|----------------------------------|----------------------------------------------|--------------------|
| 1     | 50 : 1 : 0.072 : 0.36                                                                                   | 10       | 5100               | 13800                            | 1.33                                         | 97                 |
| 2     | 100 : 1 : 0.072 : 0.36                                                                                  | 16       | 9600               | 22000                            | 1.26                                         | 94                 |
| 3     | 150 : 1 : 0.072 : 0.36                                                                                  | 23       | 13700              | 27200                            | 1.29                                         | 90                 |

<sup>a</sup> M = MMA, I = EBiB, L = Py<sub>3</sub>Tren, DMSO (50%, v/v), irradiated by visible light; <sup>b</sup> by SEC;

<sup>c</sup> by <sup>1</sup>H NMR spectroscopy.

**Table S2.** Comparison of theoretical and experimentally determined molecular mass for the significant structures found for various reagent compositions.

| Structure                                 | DP (n) | ( <i>m/z</i> ) <sub>theo</sub> <sup>a</sup> | ( <i>m/z</i> ) <sub>exp</sub> <sup>b</sup> |
|-------------------------------------------|--------|---------------------------------------------|--------------------------------------------|
| [MMAH + Na] <sup>+</sup>                  | 2      | 325.16                                      | 325.00                                     |
| [MMAH + H] <sup>+</sup>                   | 4      | 503.28                                      | 503.03                                     |
| [MMAH + Na] <sup>+</sup>                  | 4      | 525.27                                      | 525.32                                     |
| [Py <sub>3</sub> TrenH + Na] <sup>+</sup> | 1      | 536.27                                      | 536.15                                     |
| [Py <sub>3</sub> TrenH + H] <sup>+</sup>  | 2      | 614.34                                      | 614.29                                     |
| [Py <sub>3</sub> TrenH + Na] <sup>+</sup> | 2      | 636.33                                      | 636.26                                     |
| [Py <sub>3</sub> TrenH + Na] <sup>+</sup> | 3      | 736.38                                      | 736.34                                     |
| [Py <sub>3</sub> TrenH + H] <sup>+</sup>  | 4      | 814.44                                      | 814.38                                     |
| [EH + Na] <sup>+</sup>                    | 4      | 539.28                                      | 539.31                                     |
| [EH + Na] <sup>+</sup>                    | 5      | 639.34                                      | 639.27                                     |
| [EH + H] <sup>+</sup>                     | 6      | 717.40                                      | 717.35                                     |
| [EBr + H] <sup>+</sup>                    | 4      | 595.20                                      | 595.13                                     |
| [EE + Na] <sup>+</sup>                    | 4      | 653.35                                      | 653.43                                     |
| [EE + Na] <sup>+</sup>                    | 7      | 953.51                                      | 953.44                                     |
| [BrH + H] <sup>+</sup>                    | 5      | 581.19                                      | 581.21                                     |
| [BrH + H] <sup>+</sup>                    | 8      | 881.35                                      | 881.11                                     |

<sup>a</sup>Calculated exact mass. <sup>b</sup>Measured by ESI-MS.

## REFERENCES

1. D. M. Haddleton, M. C. Crossman, B. H. Dana, D. J. Duncalf, A. M. Heming, D. Kukulj and A. J. Shooter, *Macromolecules*, 1999, **32**, 2110-2119.
2. X. Xu, C. Bao, M. Hong, D. Li and Q. Zhang, *Polym. Chem.*, 2020, **11**, 6356-6364.
